# Supplementary material for: Metabolic faecal fingerprinting of trans-resveratrol and quercetin following a high-fat sucrose dietary model using liquid chromatography coupled to high-resolution mass spectrometry
Source: Royal Society of Chemistry journal article supplement (doi:10.1039/c5fo00473j), 2015-01-01
Supplement: c5fo00473j1.pdf [file c5fo00473j1.pdf]

Supplementary Table 1. *m/z* of statistically significantly differing metabolites detected in positive ionisation mode.

| ESI mode | Detected <i>m/z</i> | Rt.min | Theoretical MW | Candidate compounds                                                                                                                                                                                                   | Log FC [RSV+Q vs HFS] | Log FC [Q vs HFS] | Log FC [RSV vs HFS] | <i>p</i> (Corr)  |
|----------|---------------------|--------|----------------|-----------------------------------------------------------------------------------------------------------------------------------------------------------------------------------------------------------------------|-----------------------|-------------------|---------------------|------------------|
| +        | 230.0904            | 7.6833 | 230.0903       | - Pro Asp<br>- 2-Acetyl-5-tetrahydroxybutyl Imidazole<br>- (2S,3'S)-alpha-Amino-2-carboxy-5-oxo-1-pyrrolidinebutanoic acid<br>- Asp Pro<br>- Prolyl-Aspartate<br>- 1-(gamma-Glutamylamino)cyclopropanecarboxylic acid | 20.09                 | 0.00              | 19.73               | <i>p</i> < 0.001 |
|          |                     |        | 230.0943       | - Demethylsuberosin<br>- Pindone<br>- Pondaplin<br>- Osthenol<br>- (S)-Naproxen<br>- 6-O-Methyleuparin<br>- Demethylbatatasin IV<br>- Dihydroresveratrol<br>- Aucuparin<br>- NOPM<br>- Kawain                         |                       |                   |                     |                  |
|          |                     |        | 230.0977       | - S-methylcaptopril                                                                                                                                                                                                   |                       |                   |                     |                  |
| +        | 315.0281            | 5.0483 | 315.0274       | - Efavirenz                                                                                                                                                                                                           | 18.62                 | 18.23             | 0.00                | <i>p</i> < 0.001 |
| +        | 453.0596            | 5.0458 | 453.0562       | - Floxacillin                                                                                                                                                                                                         | 17.45                 | 16.79             | 0.00                | <i>p</i> < 0.001 |
|          |                     |        | 453.0461       | - Ammonium alum                                                                                                                                                                                                       |                       |                   |                     |                  |
|          |                     |        | 453.0454       | - Riluzolamide glucuronide                                                                                                                                                                                            |                       |                   |                     |                  |
|          |                     |        | 453.0433       | - Glucoerysolin                                                                                                                                                                                                       |                       |                   |                     |                  |
| +        | 290.0463            | 5.0483 | 290.0419       | - Brompheniramine (didemethylated)                                                                                                                                                                                    | 17.39                 | 16.95             | 0.00                | <i>p</i> < 0.001 |
|          |                     |        | 290.0403       | - Sedoheptulose 7-phosphate<br>- Sedoheptulose 1-phosphate<br>- D-glycero-D-manno-Heptose 7-phosphate                                                                                                                 |                       |                   |                     |                  |
|          |                     |        | 290.0548       | - 1-[4,9-Dihydro-2-(methylthio)-1,3-thiazino[6,5-b]indol-4-yl]-2-propanone                                                                                                                                            |                       |                   |                     |                  |
| +        | 318.9994            | 5.0483 | 318.9908       | - 5-Trifluoromethyl-2,4-disulfamoylaniline                                                                                                                                                                            | 16.68                 | 16.31             | 0.00                | <i>p</i> < 0.001 |

Supplementary Table 1. Continued

| ESI mode | Detected <i>m/z</i> | Rt.min | Theoretical MW | Candidate compounds                                                                                                                                                                                                                                                                            | Log FC [RSV+Q vs HFS] | Log FC [Q vs HFS] | Log FC [RSV vs HFS] | <i>p</i> (Corr)  |
|----------|---------------------|--------|----------------|------------------------------------------------------------------------------------------------------------------------------------------------------------------------------------------------------------------------------------------------------------------------------------------------|-----------------------|-------------------|---------------------|------------------|
| +        | 179.0574            | 5.0440 | 179.0582       | - 5,8-Dihydroxy-3,4-dihydrocarbostyryl<br>- p-Acetaminobenzoic acid<br>- 4-Oxo-4-(3-pyridyl)-butanoic acid<br>- Adrenochrome<br>- Hippuric acid<br>- N-Acetylanthranilate<br>- 1-(4-Methoxyphenyl)-2-nitroethylene<br>- 2,5,6-Trihydroxy-5,6-dihydroquinoline<br>- Methyl n-formylanthranilate | 16.43                 | 10.51             | 0.00                | <i>p</i> < 0.001 |
|          |                     |        | 179.0616       | - (R)C(R)S-S-Propylcysteine sulfoxide<br>- Cyclohexylsulfamate                                                                                                                                                                                                                                 |                       |                   |                     |                  |
| +        | 230.0897            | 7.9033 | 230.0903       | - Pro Asp<br>- 2-Acetyl-5-tetrahydroxybutyl Imidazole<br>- (2S,3'S)-alpha-Amino-2-carboxy-5-oxo-1-pyrrolidinebutanoic acid<br>- Asp Pro<br>- Prolyl-Aspartate<br>- 1-(gamma-Glutamylamino)cyclopropanecarboxylic acid                                                                          | 16.21                 | 0.00              | 16.60               | <i>p</i> < 0.001 |
|          |                     |        | 230.0943       | - Demethylsuberosin<br>- Pindone<br>- Pondaplin<br>- Osthenol<br>- (S)-Naproxen<br>- 6-O-Methyleuparin<br>- Demethylbatatin IV<br>- Dihydroresveratrol<br>- Aucuparin<br>- NOPM<br>- Kawain                                                                                                    |                       |                   |                     |                  |
|          |                     |        | 230.0977       | - S-methylcaptopril                                                                                                                                                                                                                                                                            |                       |                   |                     |                  |
| +        | 283.0786            | 5.0482 | 283.0804       | - Cucumopine                                                                                                                                                                                                                                                                                   | 15.97                 | 12.95             | 0.00                | <i>p</i> < 0.001 |
|          |                     |        | 283.0845       | - (E)-Avenanthramide D<br>- 4-NAPHTHALIMIDOBUTYRIC ACID<br>- Avenanthramide 1p                                                                                                                                                                                                                 |                       |                   |                     |                  |
| +        | 291.0043            | 5.0475 | 291.012        | - Brimonidine                                                                                                                                                                                                                                                                                  | 15.94                 | 15.56             | 0.00                | <i>p</i> < 0.001 |
| +        | 216.9793            | 5.0467 | Not identified |                                                                                                                                                                                                                                                                                                | 15.67                 | 15.22             | 0.00                | <i>p</i> < 0.001 |

Supplementary Table 1. Continued

| ESI mode | Detected <i>m/z</i> | Rt.min | Theoretical MW | Candidate compounds                                                                                                                                               | Log FC [RSV+Q vs HFS] | Log FC [Q vs HFS] | Log FC [RSV vs HFS] | <i>p</i> (Corr)  |
|----------|---------------------|--------|----------------|-------------------------------------------------------------------------------------------------------------------------------------------------------------------|-----------------------|-------------------|---------------------|------------------|
| +        | 274.0018            | 5.0467 | 274.0041       | - 4-Ketoifosfamide<br>- 4-Ketocyclophosphamide                                                                                                                    | 15.57                 | 15.17             | 0.00                | <i>p</i> < 0.001 |
|          |                     |        | 273.9995       | - L-Iduronate 2-sulfate                                                                                                                                           |                       |                   |                     |                  |
|          |                     |        | 274.0065       | - RG-14620                                                                                                                                                        |                       |                   |                     |                  |
|          |                     |        | 274.009        | - 1-Phospho- $\alpha$ -D-galacturonate<br>- 3-Dehydro-L-gulonate 6-phosphate<br>- 6-Phospho-2-dehydro-D-gluconate<br>- D-Glucuronic acid 1-phosphate              |                       |                   |                     |                  |
| +        | 591.0908            | 5.0455 | 591.081        | - WSP-1                                                                                                                                                           | 15.36                 | 12.69             | 0.00                | <i>p</i> < 0.001 |
| +        | 454.1317            | 8.8425 | 454.1369       | - 5-iodo-4-hydroxy-docosa-7Z,10Z,13Z,16Z,19Z-pentaenoic acid delta lactone                                                                                        | 14.75                 | 0.00              | 15.21               | <i>p</i> < 0.001 |
|          |                     |        | 454.1378       | - Met Cys Val Cys<br>- Diferentes péptidos                                                                                                                        |                       |                   |                     |                  |
|          |                     |        | 454.1394       | - Eupachlorin acetate                                                                                                                                             |                       |                   |                     |                  |
|          |                     |        | 454.141        | - Sirodesmin H                                                                                                                                                    |                       |                   |                     |                  |
|          |                     |        | 454.1416       | - Ampelopsin D<br>- trans-delta-Viniferin<br>- epsilon-Viniferin<br>- Gnetin A                                                                                    |                       |                   |                     |                  |
|          |                     |        | 454.1199       | Nap-Met-OH<br>Met-Nap-OH<br>Carfecillin                                                                                                                           |                       |                   |                     |                  |
|          |                     |        | 454.1192       | Cys Cys Glu Thr<br>Other peptides                                                                                                                                 |                       |                   |                     |                  |
|          |                     |        | 454.1488       | TyrMe-His-OH<br>His-TyrMe-OH                                                                                                                                      |                       |                   |                     |                  |
| +        | 324.0258            | 7.6991 | 324.0246       | - 5-O-(1-Carboxyvinyl)-3-phosphoshikimate                                                                                                                         | 13.93                 | 0.00              | 17.33               | <i>p</i> < 0.001 |
|          |                     |        | 324.0272       | - Dorzolamide                                                                                                                                                     |                       |                   |                     |                  |
|          |                     |        | 324.032        | - Chlorobenzilate                                                                                                                                                 |                       |                   |                     |                  |
|          |                     |        | 324.0359       | Arabinose Uridinemonophosphate<br>Arabinoside uridinemonophosphate<br>Uridine monophosphate (UMP)<br>Uridine 2'-phosphate<br>Pseudouridine 5'-phosphate<br>3'-UMP |                       |                   |                     |                  |

Supplementary Table 1. Continued

| ESI mode | Detected <i>m/z</i>   | Rt.min | Theoretical MW | Candidate compounds                                                                                                                          | Log FC [RSV+Q vs HFS] | Log FC [Q vs HFS] | Log FC [RSV vs HFS] | <i>p</i> (Corr)  |
|----------|-----------------------|--------|----------------|----------------------------------------------------------------------------------------------------------------------------------------------|-----------------------|-------------------|---------------------|------------------|
| +        | 156.0503              | 3.9633 | 156.0535       | - Imidazole lactate<br>- 4-Imidazolone-5-propionic acid<br>- (S)-3-(Imidazol-5-yl)lactate<br>- N-Nitrosoguvacine<br>- 1-Imidazolelactic acid | 10.63                 | -2.39             | 13.01               | <i>p</i> < 0.001 |
| +        | 135.0516              | 4.8364 | 135.0532       | - 2-Hydroxymethylserine<br>- 4-Hydroxy-L-threonine<br>- (+)-threo-2-Amino-3,4-dihydroxybutanoic acid                                         | 9.30                  | 13.93             | 9.28                | <i>p</i> = 0.043 |
|          |                       |        | 135.0545       | - Adenine<br>- 4-(Hydroxymethyl)benzenediazonium(1+)                                                                                         |                       |                   |                     |                  |
|          |                       |        | 534.2631       | - GV 150013X<br>- Pyrophaeophorbide a<br>- Pyropheophorbide a                                                                                |                       |                   |                     |                  |
|          |                       |        | 534.2584       | - Arg Lys Glu Cys<br>- Diferentes péptidos                                                                                                   |                       |                   |                     |                  |
|          |                       |        | 534.2577       | - ANTIMYCIN A (A1 shown)                                                                                                                     |                       |                   |                     |                  |
|          |                       |        | 534.2663       | - His Asn Lys His<br>- Other peptides                                                                                                        |                       |                   |                     |                  |
|          |                       |        | 534.2676       | - 7,8-Dihydrovomifoliol 9-[rhamnosyl-(1->6)-glucoside]<br>- 3-Hydroxy-beta-ionol 3-[glucosyl-(1->6)-glucoside]                               |                       |                   |                     |                  |
|          |                       |        | 534.255        | - His Glu His Ile<br>- Diferentes péptidos                                                                                                   |                       |                   |                     |                  |
|          |                       |        | 534.2696       | - Arg Thr Cys Arg<br>- Diferentes péptidos                                                                                                   |                       |                   |                     |                  |
| 534.2524 | - 2-O-Methyl-L-fucose |        |                |                                                                                                                                              |                       |                   |                     |                  |
| +        | 419.1571              | 4.2100 | 419.1652       | - Asn Thr Asp Ala<br>- Other peptides                                                                                                        | 5.49                  | -7.67             | 5.59                | <i>p</i> = 0.016 |
|          |                       |        | 419.1475       | - Asn Pro Cys Ser                                                                                                                            |                       |                   |                     |                  |
|          |                       |        | 419.1434       | - 8-Hydroxy-perphenazine<br>- Perphenazine sulfoxide<br>- Perphenazine-N-oxide<br>- 7-Hydroxyperphenazine                                    |                       |                   |                     |                  |

Supplementary Table 1. Continued

| ESI mode | Detected <i>m/z</i> | Rt.min  | Theoretical MW | Candidate compounds                                                                                                                                                                                                                                                                                                                                                           | Log FC [RSV+Q vs HFS] | Log FC [Q vs HFS] | Log FC [RSV vs HFS] | <i>p</i> (Corr)  |
|----------|---------------------|---------|----------------|-------------------------------------------------------------------------------------------------------------------------------------------------------------------------------------------------------------------------------------------------------------------------------------------------------------------------------------------------------------------------------|-----------------------|-------------------|---------------------|------------------|
| +        | 271.2462            | 9.5800  | 271.2511       | <ul style="list-style-type: none"> <li>- Hexadecanoic acid, 2-amino-, (R)-; (R)-2-Aminohexadecanoic acid</li> <li>- Hexadecanoic acid, 2-amino-, (S)</li> <li>- Hexadecanoic acid, 2-amino-, (1)-</li> <li>- C16 Sphingosine</li> <li>- Myristoyl-EA</li> <li>- 2-amino-hexadecanoic acid</li> <li>- 2-aminohexadecanoic acid</li> <li>- 2S-aminohexadecanoic acid</li> </ul> | 2.02                  | 0.07              | 2.03                | <i>p</i> = 0.003 |
| +        | 427.3569            | 12.5608 | 427.3662       | <ul style="list-style-type: none"> <li>- (R)-Stearoylcarnitine</li> <li>- DL-Stearoylcarnitine</li> </ul>                                                                                                                                                                                                                                                                     | 1.81                  | 0.25              | 1.38                | <i>p</i> = 0.019 |
| +        | 470.2701            | 14.2238 | 470.2668       | <ul style="list-style-type: none"> <li>- Withaferin A</li> <li>- Stigmatellin X</li> <li>- Withanolide A</li> <li>- Methyl lucidenate F</li> <li>- Withanolide</li> <li>- 3β-HYDROXYDEOXODIHYDRODEOXYGEDUNIN</li> </ul>                                                                                                                                                       | 1.51                  | 0.70              | 0.18                | <i>p</i> = 0.043 |
|          |                     |         | 470.274        | <ul style="list-style-type: none"> <li>- Leu Glu Pro Ile</li> <li>- Other peptides</li> </ul>                                                                                                                                                                                                                                                                                 |                       |                   |                     |                  |
|          |                     |         | 470.2645       | <ul style="list-style-type: none"> <li>- PG(15:0/0:0)</li> </ul>                                                                                                                                                                                                                                                                                                              |                       |                   |                     |                  |
|          |                     |         | 470.2759       | <ul style="list-style-type: none"> <li>- 6-bromo-25-methyl-hexacos-5E,9Z-dienoic acid</li> <li>- 6-bromo-5,9-hexacosadienoic acid</li> <li>- 6-bromo-5E,9Z-hexacosadienoic acid</li> <li>- 6-bromo-24-methyl-pentacos-5E,9Z-dienoic acid</li> </ul>                                                                                                                           |                       |                   |                     |                  |
|          |                     |         | 470.2601       | <ul style="list-style-type: none"> <li>- Pro Ala Gln Arg</li> <li>- Other peptides</li> </ul>                                                                                                                                                                                                                                                                                 |                       |                   |                     |                  |
|          |                     |         | 470.2853       | <ul style="list-style-type: none"> <li>- Pro Lys Val Gln</li> <li>- Other peptides</li> </ul>                                                                                                                                                                                                                                                                                 |                       |                   |                     |                  |

Supplementary Table 1. Continued

| ESI mode | Detected <i>m/z</i> | Rt.min  | Theoretical MW | Candidate compounds                                                                                                                                                                                                                                                                                                                                                                     | Log FC [RSV+Q vs HFS] | Log FC [Q vs HFS] | Log FC [RSV vs HFS] | <i>p</i> (Corr)  |
|----------|---------------------|---------|----------------|-----------------------------------------------------------------------------------------------------------------------------------------------------------------------------------------------------------------------------------------------------------------------------------------------------------------------------------------------------------------------------------------|-----------------------|-------------------|---------------------|------------------|
| +        | 299.2772            | 10.5000 | 299.2824       | <ul style="list-style-type: none"> <li>- (8Z,d18:1) sphingosine</li> <li>- 12-amino-octadecanoic acid</li> <li>- 2-amino-octadecanoic acid</li> <li>- Palmitoyl-EA</li> <li>- 5-hydroxy,3E-sphingosine</li> <li>- 2R-aminooctadec-4Z-ene-1,3S-diol</li> <li>- Sphingosine</li> <li>- 3-ketosphinganine</li> <li>- L-threo-Sphingosine C-18</li> <li>- Palmitoyl Ethanolamide</li> </ul> | 1.27                  | 0.00              | 1.05                | <i>p</i> = 0.011 |
| +        | 285.2613            | 10.0400 | 285.2668       | <ul style="list-style-type: none"> <li>- anteiso (4E,14-methyl-d16:1) sphingosine</li> <li>- iso (4E,15-methyl-d16:1) sphingosine</li> <li>- Pentadecanoyl-EA</li> <li>- D-erythro-Sphingosine C-17</li> </ul>                                                                                                                                                                          | 1.14                  | -0.31             | 1.11                | <i>p</i> = 0.002 |
| +        | 364.218             | 7.9400  | 364.225        | <ul style="list-style-type: none"> <li>- Insignin A</li> <li>- 3a,11b,21-Trihydroxy-20-oxo-5b-pregnan-18-al</li> <li>- Vanillin 3-(L-menthoxy)propane-1,2-diol acetal</li> <li>- Acetoxy-8-gingerol</li> <li>- Allotetrahydrocortisone</li> <li>- Tetrahydrocortisone</li> <li>- 11beta,17alpha,21-trihydroxypregnenolone</li> <li>- Dihydrocortisol</li> </ul>                         | 0.75                  | -11.42            | 1.19                | <i>p</i> = 0.009 |
|          |                     |         | 364.2111       | <ul style="list-style-type: none"> <li>- Ala Phe Lys</li> <li>- Lys Phe Ala</li> <li>- Phe Lys Ala</li> <li>- Lys Ala Phe</li> <li>- Urocortisone</li> <li>- Ala Lys Phe</li> <li>- Phe Ala Lys</li> </ul>                                                                                                                                                                              |                       |                   |                     |                  |
|          |                     |         | 364.205        | <ul style="list-style-type: none"> <li>6alpha-Fluoro-11beta,17-dihydroxypregn-4-ene-3,20-dione</li> <li>9-Fluoro-11beta,16alpha-dihydroxypregn-4-ene-3,20-dione</li> </ul>                                                                                                                                                                                                              |                       |                   |                     |                  |
|          |                     |         | 364.2038       | 3-(1,1-Dimethyl-2-propenyl)-8-(3-methyl-2-butenyl)xanthyletin                                                                                                                                                                                                                                                                                                                           |                       |                   |                     |                  |

Supplementary Table 1. Continued

| ESI mode | Detected <i>m/z</i> | Rt.min | Theoretical MW                                                                                                                                               | Candidate compounds                                                                                                                                                                                                                                                                                                                                                                                                                                                                                                                                                        | Log FC [RSV+Q vs HFS] | Log FC [Q vs HFS] | Log FC [RSV vs HFS] | <i>p</i> (Corr)  |
|----------|---------------------|--------|--------------------------------------------------------------------------------------------------------------------------------------------------------------|----------------------------------------------------------------------------------------------------------------------------------------------------------------------------------------------------------------------------------------------------------------------------------------------------------------------------------------------------------------------------------------------------------------------------------------------------------------------------------------------------------------------------------------------------------------------------|-----------------------|-------------------|---------------------|------------------|
| +        | 270.1523            | 5.2200 | 270.162                                                                                                                                                      | <ul style="list-style-type: none"> <li>- 3beta-hydroxy-estra-5,7,9-trien-17-one</li> <li>- 3-Hydroxyestra-1,3,5(10)-trien-16-one</li> <li>- 8alpha-3beta-hydroxy-estra-1,3,5(10)-trien-17-one</li> <li>- estra-1,3,5(10),7-tetraene-3,17alpha-diol</li> <li>- Estrone</li> <li>- Estra-1,3,5(10),6-tetraen-3,17beta-diol</li> <li>- ESTRA-4,9-DIENE-3,17-DIONE</li> <li>- 8α-3β-hydroxy-estra-1,3,5(10)-trien-17-one</li> <li>- estra-1,3,5(10),7-tetraene-3,17α-diol</li> <li>- Trenbolone</li> <li>- HEXESTROL</li> <li>- 3β-hydroxy-estra-5,7,9-trien-17-one</li> </ul> | 0.33                  | -2.07             | -11.44              | <i>p</i> = 0.010 |
| +        | 158.0659            | 0.6700 | 158.0691                                                                                                                                                     | <ul style="list-style-type: none"> <li>- 4-Methylene-L-glutamine</li> <li>- 5-Hydroxyectoine</li> <li>- 1-(Hydroxymethyl)-5,5-dimethyl-2,4-imidazolidinedione</li> </ul>                                                                                                                                                                                                                                                                                                                                                                                                   | 0.25                  | 1.15              | -0.07               | <i>p</i> = 0.030 |
| +        | 146.0663            | 0.6135 | 146.0691                                                                                                                                                     | <ul style="list-style-type: none"> <li>- L-Glutamine</li> <li>- B-ureidoisobutyric acid</li> <li>- Gly Ala</li> <li>- Alanyl-Glycine</li> <li>- D-Glutamine</li> <li>- Isoglutamine</li> <li>- Ala-Gly</li> <li>- Ala Gly</li> </ul>                                                                                                                                                                                                                                                                                                                                       | 0.01                  | 0.30              | -11.57              | <i>p</i> = 0.015 |
| +        | 318.1517            | 7.4325 | 318.1539                                                                                                                                                     | <ul style="list-style-type: none"> <li>- Asp Gly Lys</li> <li>- Other peptides</li> </ul>                                                                                                                                                                                                                                                                                                                                                                                                                                                                                  | -1.07                 | -1.29             | -0.51               | <i>p</i> = 0.036 |
| 318.1555 |                     |        | - Fluvoxamine                                                                                                                                                |                                                                                                                                                                                                                                                                                                                                                                                                                                                                                                                                                                            |                       |                   |                     |                  |
| 318.1558 |                     |        | - 2-bromopalmitaldehyde                                                                                                                                      |                                                                                                                                                                                                                                                                                                                                                                                                                                                                                                                                                                            |                       |                   |                     |                  |
| 318.1467 |                     |        | <ul style="list-style-type: none"> <li>- 2-Hydroxyenterodiol</li> <li>- 4-Hydroxyenterodiol</li> <li>- 6-Hydroxyenterodiol</li> <li>- Zearalenone</li> </ul> |                                                                                                                                                                                                                                                                                                                                                                                                                                                                                                                                                                            |                       |                   |                     |                  |

Supplementary Table 1. Continued

| ESI mode | Detected m/z | Rt.min  | Theoretical MW | Candidate compounds                                                                                                                                                                                                                                                                                    | Log FC [RSV+Q vs HFS] | Log FC [Q vs HFS] | Log FC [RSV vs HFS] | p (Corr) |
|----------|--------------|---------|----------------|--------------------------------------------------------------------------------------------------------------------------------------------------------------------------------------------------------------------------------------------------------------------------------------------------------|-----------------------|-------------------|---------------------|----------|
| +        | 394.0765     | 7.3117  | 394.0777       | - 5'-Butyrylphosphoridine                                                                                                                                                                                                                                                                              | -2.28                 | -0.13             | -12.19              | p= 0.009 |
|          |              |         | 394.0741       | - Diflufenican                                                                                                                                                                                                                                                                                         |                       |                   |                     |          |
|          |              |         | 394.0689       | - Prostalidin A<br>- Tetracenomyacin D3 methylester<br>- Tetracenomyacin B3<br>- Demethyltorosaflavone C                                                                                                                                                                                               |                       |                   |                     |          |
|          |              |         | 394.09         | - 9-Hydroxy-4-methoxypsoralen 9-glucoside                                                                                                                                                                                                                                                              |                       |                   |                     |          |
| +        | 330.1512     | 5.4978  | 330.1499       | - 8-Hydroxyclopropylamine<br>- 2-Hydroxyclopropylamine                                                                                                                                                                                                                                                 | -3.19                 | -12.73            | -0.55               | p= 0.009 |
|          |              |         | 330.1539       | - Ser Ala Gly Pro<br>- Modificados                                                                                                                                                                                                                                                                     |                       |                   |                     |          |
|          |              |         | 330.1467       | - TETRAHYDROSAPPANONE A TRIMETHYL ETHER                                                                                                                                                                                                                                                                |                       |                   |                     |          |
|          |              |         | 330.1402       | - Desmethyl methotrimeprazine 5-sulfoxide<br>- Pyributicarb                                                                                                                                                                                                                                            |                       |                   |                     |          |
|          |              |         | 330.1387       | 17alpha-Chloroethynylestradiol                                                                                                                                                                                                                                                                         |                       |                   |                     |          |
| +        | 356.3001     | 14.2962 | 356.2927       | - 3-(2-Heptenyloxy)-2-hydroxypropyl undecanoate<br>- MG(18:1(11E)/0:0/0:0)[rac]<br>- MG(18:1(9Z)/0:0/0:0)[rac]<br>- Heneicosanedioic acid<br>- Stearoyllactic acid<br>- MG(0:0/18:1(11Z)/0:0)<br>- MG(18:1(9Z)/0:0/0:0)<br>- MG(18:1(9Z)/0:0/0:0)<br>- MG(0:0/18:1(9Z)/0:0)<br>- MG(18:1(11Z)/0:0/0:0) | -9.74                 | -14.58            | -2.35               | p= 0.008 |
|          |              |         | 356.3079       | - 26,27-bisnor-22-dehydro-cholesterol<br>- (-)-Ceriferol 1                                                                                                                                                                                                                                             |                       |                   |                     |          |
| +        | 240.1919     | 7.1323  |                | Not identified                                                                                                                                                                                                                                                                                         | -9.94                 | -9.85             | 2.58                | p= 0.020 |



Supplementary Table 1. Continued

| ESI mode | Detected <i>m/z</i> | Rt.min  | Theoretical MW | Candidate compounds                                                                                                                                                                                                                                                                                                                                                                                                                          | Log FC [RSV+Q vs HFS] | Log FC [Q vs HFS] | Log FC [RSV vs HFS] | <i>p</i> (Corr)  |
|----------|---------------------|---------|----------------|----------------------------------------------------------------------------------------------------------------------------------------------------------------------------------------------------------------------------------------------------------------------------------------------------------------------------------------------------------------------------------------------------------------------------------------------|-----------------------|-------------------|---------------------|------------------|
| +        | 366.1125            | 5.0393  | 366.1103       | - Puerarostan<br>- 3,9-Dihydroxy-1-methoxy-8-prenylcoumestan<br>- Mirificoumestan<br>- Neorautenanol<br>- 3'-Hydroxyalpinumisoflavone 4'-methyl ether<br>- Barpisoiflavone C<br>- Isoglycyrol<br>- Desmodol<br>- Glycyrol<br>- Wampetin<br>- Vellokaempferol 3-methyl ether<br>- 5-Hydroxy-8-(4-hydroxy-3-methoxyphenyl)-2,2-dimethyl-2H,6H-benzo[1,2-b:5,4-b']dipyrans-6-one<br>- Racemoflavone<br>- Derrubone<br>- Glycyrrhizaisoflavone B | -11.45                | -9.10             | 0.00                | <i>p</i> = 0.011 |
|          |                     |         | 366.1191       | - Ridogrel                                                                                                                                                                                                                                                                                                                                                                                                                                   |                       |                   |                     |                  |
|          |                     |         | 366.1209       | - Gly Ser Thr Cys<br>- Other peptides                                                                                                                                                                                                                                                                                                                                                                                                        |                       |                   |                     |                  |
|          |                     |         | 366.1216       | - N-Caffeoyltryptophan                                                                                                                                                                                                                                                                                                                                                                                                                       |                       |                   |                     |                  |
|          |                     |         | 366.1032       | - Met Asn Cys<br>- Other peptides                                                                                                                                                                                                                                                                                                                                                                                                            |                       |                   |                     |                  |
|          |                     |         | 366.1023       | - Atovaquone                                                                                                                                                                                                                                                                                                                                                                                                                                 |                       |                   |                     |                  |
|          |                     |         | 366.1234       | - 3''-Chloro-3''-deoxytriphasiol                                                                                                                                                                                                                                                                                                                                                                                                             |                       |                   |                     |                  |
|          |                     |         | 665.3047       | - Natamycin                                                                                                                                                                                                                                                                                                                                                                                                                                  |                       |                   |                     |                  |
| +        | 665.3043            | 15.4793 | 665.2962       | - Trp Gln Phe Trp<br>- Other peptides                                                                                                                                                                                                                                                                                                                                                                                                        | -12.80                | -10.31            | -0.32               | <i>p</i> = 0.010 |

Supplementary Table 1. Continued

| ESI mode | Detected <i>m/z</i> | Rt.min  | Theoretical MW | Candidate compounds                                                                                                                                                                                                                                                                                                                                                                                                                                                                                                                                                                                                                                                                                                                                                                                                                                                                                                                                                                                                                                                                                                                 | Log FC [RSV+Q vs HFS] | Log FC [Q vs HFS] | Log FC [RSV vs HFS] | <i>p</i> (Corr)  |
|----------|---------------------|---------|----------------|-------------------------------------------------------------------------------------------------------------------------------------------------------------------------------------------------------------------------------------------------------------------------------------------------------------------------------------------------------------------------------------------------------------------------------------------------------------------------------------------------------------------------------------------------------------------------------------------------------------------------------------------------------------------------------------------------------------------------------------------------------------------------------------------------------------------------------------------------------------------------------------------------------------------------------------------------------------------------------------------------------------------------------------------------------------------------------------------------------------------------------------|-----------------------|-------------------|---------------------|------------------|
| +        | 452.3176            | 14.5188 | 452.3102       | <ul style="list-style-type: none"> <li>- 24,24-difluoro-1<math>\alpha</math>,25-dihydroxyvitamin D3 / 24,24-difluoro-1<math>\alpha</math>,25-dihydroxycholecalciferol</li> <li>- 4,4-difluoro-1<math>\alpha</math>,25-dihydroxyvitamin D3 / 4,4-difluoro-1<math>\alpha</math>,25-dihydroxycholecalciferol</li> <li>- 23,23-difluoro-1<math>\alpha</math>,25-dihydroxyvitamin D3 / 23,23-difluoro-1<math>\alpha</math>,25-dihydroxycholecalciferol</li> <li>- (5Z)-4,4-difluoro-1<math>\alpha</math>,25-dihydroxyvitamin D3 / (5Z)-4,4-difluoro-1<math>\alpha</math>,25-dihydroxycholecalciferol</li> <li>- PA(O-20:0/0:0)</li> </ul>                                                                                                                                                                                                                                                                                                                                                                                                                                                                                                | -12.99                | -8.04             | 0.31                | <i>p</i> = 0.021 |
|          |                     |         | 452.329        | <ul style="list-style-type: none"> <li>- 3-OXOURSAN (28-13)OLIDE</li> <li>- Tyromycic acid</li> <li>- VD 2736</li> <li>- 3-Oxo-12,18-ursadien-28-oic acid</li> <li>- (17Z)-1<math>\alpha</math>,25-dihydroxy-26,27-dimethyl-17,20,22,22,23,23-hexadehydro-24a-homovitamin D3 / (17Z)-1<math>\alpha</math>,25-dihydroxy-26,27-dimethyl-17,20,22,22,23,23-hexadehydro-24a-homocholecalciferol</li> <li>- (17E)-1<math>\alpha</math>,25-dihydroxy-26,27-dimethyl-17,20,22,22,23,23-hexadehydro-24a-homovitamin D3 / (17E)-1<math>\alpha</math>,25-dihydroxy-26,27-dimethyl-17,20,22,22,23,23-hexadehydro-24a-homocholecalciferol</li> <li>- 1<math>\alpha</math>,25-dihydroxy-26,27-dimethyl-20,21,22,22,23,23-hexadehydro-24a-homovitamin D3 / 1<math>\alpha</math>,25-dihydroxy-26,27-dimethyl-20,21,22,22,23,23-hexadehydro-24a-homocholecalciferol</li> <li>- (22E,24E,24bE)-1<math>\alpha</math>,25-dihydroxy-22,23,24,24a,24b,24c-hexadehydro-24a,24b,24c-trihomovitamin D3 / (22E,24E,24bE)-1<math>\alpha</math>,25-dihydroxy-22,23,24,24a,24b,24c-hexadehydro-24a,24b,24c-trihomocholecalciferol</li> <li>- VD 2728</li> </ul> |                       |                   |                     |                  |

Supplementary Table 1. Continued

| ESI mode | Detected <i>m/z</i> | Rt.min | Theoretical MW | Candidate compounds                                                                                                                                                                                                                                                                                                              | Log FC [RSV+Q vs HFS] | Log FC [Q vs HFS] | Log FC [RSV vs HFS] | <i>p</i> (Corr)  |
|----------|---------------------|--------|----------------|----------------------------------------------------------------------------------------------------------------------------------------------------------------------------------------------------------------------------------------------------------------------------------------------------------------------------------|-----------------------|-------------------|---------------------|------------------|
| +        | 326.1272            | 9.8175 | 326.1267       | - Scriptaid                                                                                                                                                                                                                                                                                                                      | -14.37                | -4.93             | -9.62               | <i>p</i> = 0.032 |
|          |                     |        | 326.1298       | - Clozapine                                                                                                                                                                                                                                                                                                                      |                       |                   |                     |                  |
|          |                     |        | 326.1226       | - 6,7-Dimethyl-8-(1-D-ribityl)lumazine                                                                                                                                                                                                                                                                                           |                       |                   |                     |                  |
|          |                     |        | 326.1318       | - 2,2,4-Trimethyl-3-(4-fluorophenyl)-2H-1-benzopyran-7-ol acetate                                                                                                                                                                                                                                                                |                       |                   |                     |                  |
|          |                     |        | 326.1213       | - Scillabiose<br>- 2-O-a-L-Fucopyranosyl-galactose<br>- Rutinose<br>- beta-D-Galactosyl-(1->4)-L-rhamnose<br>- 3-O-a-L-Fucopyranosyl-D-glucose<br>- 2-O-alpha-L-Rhamnopyranosyl-D-glucopyranose<br>- Robinobiose                                                                                                                 |                       |                   |                     |                  |
|          |                     |        | 326.1339       | - Asn Gly His<br>- Other peptides                                                                                                                                                                                                                                                                                                |                       |                   |                     |                  |
|          |                     |        | 326.1186       | - 3-Hydroxydesloratadine<br>- 2H-Benzo[5,6]cyclohepta[1,2-b]pyridin-2-one, 8-chloro-1,5,6,11-tetrahydro-11-(4-piperidinylidene)-<br>- 5H-Benzo[5,6]cyclohepta[1,2-b]pyridin-5-ol, 8-chloro-6,11-dihydro-11-(4-piperidinylidene)-<br>- 5H-Benzo[5,6]cyclohepta[1,2-b]pyridin-6-ol, 8-chloro-6,11-dihydro-11-(4-piperidinylidene)- |                       |                   |                     |                  |
|          |                     |        | 326.1366       | - 4-(4-Hydroxyphenyl)-2-butanone glucoside<br>- Citrusin C<br>- Hinokitiol glucoside                                                                                                                                                                                                                                             |                       |                   |                     |                  |
|          |                     |        | 326.1365       | - Tetranor-PGEM<br>- 1-Methoxy-3-(4-hydroxyphenyl)-2E-propenal 4'-glucoside                                                                                                                                                                                                                                                      |                       |                   |                     |                  |

Supplementary Table 1. Continued

| ESI mode | Detected m/z | Rt.min  | Theoretical MW | Candidate compounds                                                                                                                                                                                                                                                                                                                                                                                                                                                                                                                                                                                                                                                                                                                                                                                                                                                                                                                                                                                                                                                                                                                                                                                                                                                                                                                                                                                                                                                                                                                                                                                                                                                                                                                                                                                                                                                                                                                                                                                                                                                                                                                                                                                                                                                                                                                                                                  | Log FC [RSV+Q vs HFS] | Log FC [Q vs HFS] | Log FC [RSV vs HFS] | p (Corr) |
|----------|--------------|---------|----------------|--------------------------------------------------------------------------------------------------------------------------------------------------------------------------------------------------------------------------------------------------------------------------------------------------------------------------------------------------------------------------------------------------------------------------------------------------------------------------------------------------------------------------------------------------------------------------------------------------------------------------------------------------------------------------------------------------------------------------------------------------------------------------------------------------------------------------------------------------------------------------------------------------------------------------------------------------------------------------------------------------------------------------------------------------------------------------------------------------------------------------------------------------------------------------------------------------------------------------------------------------------------------------------------------------------------------------------------------------------------------------------------------------------------------------------------------------------------------------------------------------------------------------------------------------------------------------------------------------------------------------------------------------------------------------------------------------------------------------------------------------------------------------------------------------------------------------------------------------------------------------------------------------------------------------------------------------------------------------------------------------------------------------------------------------------------------------------------------------------------------------------------------------------------------------------------------------------------------------------------------------------------------------------------------------------------------------------------------------------------------------------------|-----------------------|-------------------|---------------------|----------|
| +        | 466.3325     | 14.8791 | 466.3294       | <ul style="list-style-type: none"> <li>- 3alpha,7alpha,12alpha,22S-tetrahydroxy-5beta-cholestan-26-oic acid</li> <li>- (25S)-3alpha,7alpha,12alpha,24R-tetrahydroxy-5beta-cholestan-26-oic acid</li> <li>- (25S)-2beta,3alpha,7alpha,12alpha-tetrahydroxy-5beta-cholestan-26-oic acid</li> <li>- (25R)-1beta,3alpha,7alpha,12alpha-tetrahydroxy-5beta-cholestan-26-oic acid</li> <li>- 3alpha,7alpha,22S-trihydroxy-5alpha-cholestan-26-oic acid</li> <li>- 3alpha,7alpha,12alpha,26-tetrahydroxy-5alpha-cholestan-27-oic acid</li> <li>- (25R)-3alpha,7alpha,12alpha,24R-tetrahydroxy-5beta-cholestan-26-oic acid</li> <li>- (25S)-3alpha,7alpha,12alpha,24S-tetrahydroxy-5beta-cholestan-26-oic acid</li> <li>- 3alpha,7alpha,16alpha,24R-Tetrahydroxy-5beta-cholestan-26-oic acid</li> <li>- 3alpha,7alpha,12alpha,16alpha-Tetrahydroxy-5beta-cholestan-26-oic acid</li> <li>- 3alpha,7alpha,16alpha,22S-Tetrahydroxy-5beta-cholestan-26-oic acid</li> <li>- 3alpha,7alpha,15alpha,22S-Tetrahydroxy-5beta-cholestan-26-oic acid</li> <li>- (25R)-3alpha,7alpha,12alpha,24S-tetrahydroxy-5beta-cholestan-26-oic acid</li> <li>- 3alpha,7alpha,12alpha,26-Tetrahydroxy-5beta-cholestan-27-oic acid</li> <li>- 3alpha,7alpha,12alpha,25-Tetrahydroxy-5beta-cholestan-26-oic acid</li> <li>- 3alpha,6alpha,7alpha,12alpha-Tetrahydroxy-5beta-cholestan-26-oic acid</li> <li>- 1β,3α,7α,12α-Tetrahydroxy-5β-cholestan-26-oic acid</li> <li>- 3α,6α,7α,12α-Tetrahydroxy-5β-cholestan-26-oic acid</li> <li>- 3α,7α,12α,23-Tetrahydroxy-5β-cholestan-26-oic acid</li> <li>- 3α,7α,12α,24-Tetrahydroxy-5α-cholestan-26-oic acid</li> <li>- 2β,3α,7α,12α-Tetrahydroxy-5β-cholestan-26-oic acid</li> <li>- 3α,7α,12α,22-Tetrahydroxy-5β-cholestan-26-oic acid</li> <li>- 3α,7α,12α,25-Tetrahydroxy-5β-cholestan-26-oic acid</li> <li>- 2beta,3alpha,7alpha,12alpha-Tetrahydroxy-5beta-cholestan-26-oic acid</li> <li>- 1beta,3alpha,7alpha,12alpha-Tetrahydroxy-5beta-cholestan-26-oic acid</li> <li>- Varanic acid</li> <li>- 3alpha,7alpha,12alpha,23-Tetrahydroxy-5beta-cholestan-26-oic acid</li> <li>- 3alpha,7alpha,12alpha,24-Tetrahydroxy-5alpha-cholestan-26-oic acid</li> <li>- 3alpha,7alpha,12alpha,22-Tetrahydroxy-5beta-cholestan-26-oic acid</li> <li>- 24,24-difluoro-1α,25-dihydroxy-24a-homovitamin D3 / 24,24-difluoro-1α,25-dihydroxy-24a-homocholecalciferol</li> </ul> | -14.73                | -12.27            | -4.54               | p= 0.009 |
|          |              |         | 466.3258       | - 24,24-difluoro-1α,25-dihydroxy-24a-homovitamin D3 / 24,24-difluoro-1α,25-dihydroxy-24a-homocholecalciferol                                                                                                                                                                                                                                                                                                                                                                                                                                                                                                                                                                                                                                                                                                                                                                                                                                                                                                                                                                                                                                                                                                                                                                                                                                                                                                                                                                                                                                                                                                                                                                                                                                                                                                                                                                                                                                                                                                                                                                                                                                                                                                                                                                                                                                                                         |                       |                   |                     |          |
|          |              |         | 466.3447       | <ul style="list-style-type: none"> <li>- 2,3-epoxyphyloquinone</li> <li>- (17Z)-1α,25-dihydroxy-26,27-dimethyl-17,20,22,22,23,23-hexadehydro-24a,24b-dihomovitamin D3 / (17Z)-1α,25-dihydroxy-26,27-dimethyl-17,20,22,22,23,23-hexadehydro-24a,24b-dihomocholecalciferol</li> </ul>                                                                                                                                                                                                                                                                                                                                                                                                                                                                                                                                                                                                                                                                                                                                                                                                                                                                                                                                                                                                                                                                                                                                                                                                                                                                                                                                                                                                                                                                                                                                                                                                                                                                                                                                                                                                                                                                                                                                                                                                                                                                                                  |                       |                   |                     |          |

Supplementary Table 1. Continued

| ESI mode | Detected <i>m/z</i> | Rt.min | Theoretical MW | Candidate compounds                                                                                                                                                                                                                                  | Log FC [RSV+Q vs HFS] | Log FC [Q vs HFS] | Log FC [RSV vs HFS] | <i>p</i> (Corr)   |
|----------|---------------------|--------|----------------|------------------------------------------------------------------------------------------------------------------------------------------------------------------------------------------------------------------------------------------------------|-----------------------|-------------------|---------------------|-------------------|
| +        | 632.117             | 5.0455 | 632.1132       | - UDP-2,4-bis(acetamido)-2,4,6-trideoxy-beta-L-altropyranose                                                                                                                                                                                         | 17.45                 | 16.79             | 0.00                | <i>p</i> < 0.0001 |
|          |                     |        | 632.1013       | - 8-C-Ascorbylepigallocatechin 3-gallate<br>- Myricetin 7-(6''-galloylglucoside)<br>- Myricetin 3-(2''-galloylglucoside)<br>- Myricetin 3-(6''-galloylgalactoside)<br>- Myricetin 3-(6''-galloylglucoside)<br>- Myricetin 3-(2''-galloylgalactoside) |                       |                   |                     |                   |
| +        | 407.1281            | 6.1975 | 407.1362       | - Glu Met Glu<br>- gamma-L-Glutamyl-gamma-L-glutamyl-L-methionine<br>- Glu Glu Met<br>- Met Glu Glu<br>- 8-Carboxymethyldihydrochelerythrine                                                                                                         | 14.93                 | 0.00              | 14.93               | <i>p</i> < 0.0001 |
|          |                     |        | 407.1369       | - 8-Carboxymethyldihydrochelerythrine                                                                                                                                                                                                                |                       |                   |                     |                   |
|          |                     |        | 407.1181       | - Sitagliptin                                                                                                                                                                                                                                        |                       |                   |                     |                   |
|          |                     |        | 407.1434       | - YS121                                                                                                                                                                                                                                              |                       |                   |                     |                   |

Statistical analyses were performed using One-Way ANOVA followed by Tukey range test and *p* values were corrected by Benjamini-Hochberg procedure. ESI, electrospray ionization mode; Rt, retention time; MW, molecular weight; HFS, high fat sucrose diet-fed control rats; RSV, supplemented with 15 mg/kg BW/day of *trans*-resveratrol; Q, supplemented with 30 mg/kg BW/day of quercetin; RSV + Q, supplemented with a combination of *trans*-resveratrol and quercetin at the same doses; Log FC, log<sub>2</sub> value of fold change.
