# Supplementary material for: Metabolic faecal fingerprinting of trans-resveratrol and quercetin following a high-fat sucrose dietary model using liquid chromatography coupled to high-resolution mass spectrometry
Source: Royal Society of Chemistry journal article supplement (doi:10.1039/c5fo00473j), 2015-01-01
Supplement: c5fo00473j2.pdf [file c5fo00473j2.pdf]

Supplementary Table 2. *m/z* of statistically significantly differing metabolites detected in negative ionisation mode.

| ESI mode | Detected <i>m/z</i> | Rt.min | Theoretical MW | Candidate compounds                                                                                                                                                                                                                                                                           | Log FC [RSV+Q vs HFS] | Log FC [Q vs HFS] | Log FC [RSV vs HFS] | <i>p</i> (Corr)  |
|----------|---------------------|--------|----------------|-----------------------------------------------------------------------------------------------------------------------------------------------------------------------------------------------------------------------------------------------------------------------------------------------|-----------------------|-------------------|---------------------|------------------|
| -        | 179.0641            | 3.4485 | 179.0616       | - Cyclohexylsulfamate<br>- (R)C(R)S-S-Propylcysteine sulfoxide                                                                                                                                                                                                                                | 20.4                  | 19.8              | 0.0                 | <i>p</i> < 0.001 |
|          |                     |        | 179.0695       | - Acetylisoniazid                                                                                                                                                                                                                                                                             |                       |                   |                     |                  |
|          |                     |        | 179.0582       | - p-Acetaminobenzoic acid<br>- 4-Oxo-4-(3-pyridyl)-butanoic acid<br>- 5,8-Dihydroxy-3,4-dihydrocarbostyrl<br>- Hippuric acid<br>- N-Acetylanthranilate<br>- 2,5,6-Trihydroxy-5,6-dihydroquinoline<br>- Methyl n-formylanthranilate<br>- 1-(4-Methoxyphenyl)-2-nitroethylene<br>- Adrenochrome |                       |                   |                     |                  |
| -        | 326.1971            | 6.7775 | 326.1994       | - Ajmaline<br>- (-)-Tortuosamine<br>- Hydroquinidine<br>- Hydroquinine                                                                                                                                                                                                                        | 16.0                  | -3.2              | 6.5                 | <i>p</i> = 0.010 |
|          |                     |        | 326.1916       | - 2-Dodecylbenzenesulfonic acid                                                                                                                                                                                                                                                               |                       |                   |                     |                  |
|          |                     |        | 326.1882       | - Pregna-4,16-diene-3,11,20-trione<br>- Isoacitretin<br>- AA861<br>- Moxestrol<br>- 2-Methoxy-17a-ethynylestradiol<br>- 2-Hydroxymestranol<br>- Acitretin                                                                                                                                     |                       |                   |                     |                  |
|          |                     |        | 326.2093       | - 9K,12,13-diHODE<br>- (3b,6b,8a,12a)-8,12-Epoxy-7(11)-eremophilene-6,8,12-trimethoxy-3-ol<br>- 2R-hydroperoxy-9Z,12Z,15Z-octadecatrienoic acid<br>- 2,3-Dinor-11b-PGF2a<br>- 2,3-dinor-8-iso-PGF2a<br>- 2,3-dinor-PGE1<br>- 2,3-dinor Prostaglandin E1                                       |                       |                   |                     |                  |

Supplementary Table 2. Continued

| ESI mode                  | Detected m/z                          | Rt.min | Theoretical MW | Candidate compounds                     | Log FC [RSV+Q vs HFS] | Log FC [Q vs HFS] | Log FC [RSV vs HFS] | p (Corr)  |
|---------------------------|---------------------------------------|--------|----------------|-----------------------------------------|-----------------------|-------------------|---------------------|-----------|
| -                         | 276.0868                              | 5.7192 | 276.0845       | - Ranunculin                            | 14.5                  | 0.0               | 14.3                | p < 0.001 |
|                           |                                       |        | 276.0939       | - Benzo[ghi]perylene                    |                       |                   |                     |           |
|                           |                                       |        |                | - Anthanthrene                          |                       |                   |                     |           |
|                           |                                       |        |                | - Indeno[1,2,3-cd]pyrene                |                       |                   |                     |           |
|                           |                                       |        | 276.0798       | - 3',4'-dihydroxyflurbiprofen           |                       |                   |                     |           |
|                           |                                       |        |                | - Clenbuterol                           |                       |                   |                     |           |
|                           |                                       |        | 276.078        | - Biotin sulfone                        |                       |                   |                     |           |
| 276.0958                  | - Glu Glu                             |        |                |                                         |                       |                   |                     |           |
|                           | - thymidine glycol                    |        |                |                                         |                       |                   |                     |           |
|                           | - Gamma Glutamylglutamic acid         |        |                |                                         |                       |                   |                     |           |
|                           | - Glutamyl-glutamic acid              |        |                |                                         |                       |                   |                     |           |
| 276.0962                  | - 4,4-Bis(p-fluorophenyl)butyric acid |        |                |                                         |                       |                   |                     |           |
| 276.097                   | - Triphenylsilanol                    |        |                |                                         |                       |                   |                     |           |
| -                         | 124.0548                              | 5.0447 | 124.0524       | - 2-Acetyl-5-methylfuran                | 12.1                  | 0.0               | 15.2                | p < 0.001 |
|                           |                                       |        |                | - Orcinol                               |                       |                   |                     |           |
|                           |                                       |        |                | - 4,6-Heptadiyne-1,3-diol               |                       |                   |                     |           |
|                           |                                       |        |                | - 1-(2-Furanyl)-1-propanone             |                       |                   |                     |           |
|                           |                                       |        |                | - Guaiacol                              |                       |                   |                     |           |
|                           |                                       |        |                | - p-Methylolphenol                      |                       |                   |                     |           |
|                           |                                       |        |                | - 1-(2-Furanyl)-2-propanone             |                       |                   |                     |           |
|                           |                                       |        |                | - 2-Acetyl-3-methylfuran                |                       |                   |                     |           |
|                           |                                       |        |                | - Mequinol                              |                       |                   |                     |           |
|                           |                                       |        |                | - trans,trans-hepta-2,4,6-trienoic acid |                       |                   |                     |           |
|                           |                                       |        |                | - Salicyl alcohol                       |                       |                   |                     |           |
|                           |                                       |        |                | - cis,trans-hepta-2,4,6-trienoic acid   |                       |                   |                     |           |
|                           |                                       |        |                | - 4-Methylcatechol                      |                       |                   |                     |           |
| - 3-Hydroxybenzyl alcohol |                                       |        |                |                                         |                       |                   |                     |           |
| - 2,3-Dihydroxytoluene    |                                       |        |                |                                         |                       |                   |                     |           |
| -                         | 435.2889                              | 7.0480 | 435.2807       | - N-acetyl-S-geranylgeranyl-L-Cysteine  | 8.8                   | 11.4              | -0.1                | p = 0.011 |

Supplementary Table 2. Continued

| ESI mode                                                          | Detected m/z                                                             | Rt.min | Theoretical MW  | Candidate compounds     | Log FC [RSV+Q vs HFS] | Log FC [Q vs HFS] | Log FC [RSV vs HFS] | p (Corr) |
|-------------------------------------------------------------------|--------------------------------------------------------------------------|--------|-----------------|-------------------------|-----------------------|-------------------|---------------------|----------|
| -                                                                 | 230.0978                                                                 | 5.1591 | 230.0977        | - S-methylcaptopril     | 6.3                   | 2.4               | 6.6                 | p= 0.029 |
|                                                                   |                                                                          |        | 230.0943        | - Demethylsuberosin     |                       |                   |                     |          |
|                                                                   |                                                                          |        |                 | - Osthenol              |                       |                   |                     |          |
|                                                                   |                                                                          |        |                 | - Kawain                |                       |                   |                     |          |
|                                                                   |                                                                          |        |                 | - Pindone               |                       |                   |                     |          |
|                                                                   |                                                                          |        |                 | - DL-Kavain             |                       |                   |                     |          |
| - (S)-Naproxen                                                    |                                                                          |        |                 |                         |                       |                   |                     |          |
| - Pondaplin                                                       |                                                                          |        |                 |                         |                       |                   |                     |          |
| - Aucuparin                                                       |                                                                          |        |                 |                         |                       |                   |                     |          |
| - NOPM                                                            |                                                                          |        |                 |                         |                       |                   |                     |          |
| - 6-O-Methyleuparin                                               |                                                                          |        |                 |                         |                       |                   |                     |          |
| - Dihydroresveratrol                                              |                                                                          |        |                 |                         |                       |                   |                     |          |
| - Demethylbatatasin IV                                            |                                                                          |        |                 |                         |                       |                   |                     |          |
| 230.1031                                                          | - N- (3-TRIFLUOROMETHYLPHENYL)PIPERAZINE (TFMPP)                         |        |                 |                         |                       |                   |                     |          |
| 230.0903                                                          | - Prolyl-Aspartate                                                       |        |                 |                         |                       |                   |                     |          |
|                                                                   | - Aspartyl-Proline                                                       |        |                 |                         |                       |                   |                     |          |
|                                                                   | - 1-(gamma-Glutamylamino)cyclopropanecarboxylic acid                     |        |                 |                         |                       |                   |                     |          |
| - (2S,3'S)-alpha-Amino-2-carboxy-5-oxo-1-pyrrolidinebutanoic acid |                                                                          |        |                 |                         |                       |                   |                     |          |
| - 2-Acetyl-5-tetrahydroxybutyl Imidazole                          |                                                                          |        |                 |                         |                       |                   |                     |          |
| - Asp Pro                                                         |                                                                          |        |                 |                         |                       |                   |                     |          |
| - Pro Asp                                                         |                                                                          |        |                 |                         |                       |                   |                     |          |
| 230.1055                                                          | - 1,2-Dihydroxytacrine                                                   |        |                 |                         |                       |                   |                     |          |
|                                                                   | - 1,4-Dihydroxytacrine                                                   |        |                 |                         |                       |                   |                     |          |
|                                                                   | - (1xi,3xi)-1,2,3,4-Tetrahydro-1-methyl-beta-carboline-3-carboxylic acid |        |                 |                         |                       |                   |                     |          |
|                                                                   | - 1,7-Dihydroxytacrine                                                   |        |                 |                         |                       |                   |                     |          |
|                                                                   | - 2,4-Dihydroxytacrine                                                   |        |                 |                         |                       |                   |                     |          |
| -                                                                 | 318.1633                                                                 | 4.3943 | 318.1652        | - Ser Gly Arg           | -0.9                  | -1.1              | -0.6                | p= 0.039 |
|                                                                   |                                                                          |        | - More peptides |                         |                       |                   |                     |          |
|                                                                   |                                                                          |        | 318.1692        | - Eseramine             |                       |                   |                     |          |
|                                                                   |                                                                          |        | - LY171883      |                         |                       |                   |                     |          |
|                                                                   |                                                                          |        | 318.1558        | - 2-bromopalmitaldehyde |                       |                   |                     |          |
| 318.1555                                                          | - Fluvoxamine                                                            |        |                 |                         |                       |                   |                     |          |
| 318.1539                                                          | - Ser Val Asn                                                            |        |                 |                         |                       |                   |                     |          |
|                                                                   | - Other peptides                                                         |        |                 |                         |                       |                   |                     |          |

Supplementary Table 2. Continued

| ESI mode | Detected m/z | Rt.min | Theoretical MW | Candidate compounds                                                                                                                                                                                                                                                                                                                                                                                                                                                                                                                                                                                                                                                                                                                                                                                                   | Log FC [RSV+Q vs HFS] | Log FC [Q vs HFS] | Log FC [RSV vs HFS] | p (Corr) |
|----------|--------------|--------|----------------|-----------------------------------------------------------------------------------------------------------------------------------------------------------------------------------------------------------------------------------------------------------------------------------------------------------------------------------------------------------------------------------------------------------------------------------------------------------------------------------------------------------------------------------------------------------------------------------------------------------------------------------------------------------------------------------------------------------------------------------------------------------------------------------------------------------------------|-----------------------|-------------------|---------------------|----------|
| -        | 332.2617     | 5.3027 | 332.2563       | <ul style="list-style-type: none"> <li>- Phloionolic acid</li> <li>- 9R,10S,18-trihydroxy-stearic acid</li> <li>- 9,10,13-Trihydroxystearic acid</li> <li>- 18-hydroxy-9S,10R-dihydroxy-stearic acid</li> </ul>                                                                                                                                                                                                                                                                                                                                                                                                                                                                                                                                                                                                       | -6.7                  | 6.8               | -6.7                | p< 0.001 |
|          |              |        | 332.2715       | <ul style="list-style-type: none"> <li>- 8, 12, 16, 19 (20)-docosatetraenoic acid; C22:4n-3,6,10,14</li> <li>- C22:4n-9,12,15,18</li> <li>- 22:4(7Z,13Z,16Z,19Z)</li> <li>- 3-Hydroxy-1-phenyl-1-hexadecanone</li> <li>- 2-Methyl-5-(8-pentadecenyl)-1,3-benzenediol</li> <li>- 5alpha-Androstan-17beta-ol propionate</li> <li>- 1-Hydroxy-1-phenyl-3-hexadecanone</li> <li>- 22:4(4Z,7Z,10Z,13E)</li> <li>- (±)-CP 47,497-C8-homolog</li> <li>- 8,12,16,19-docosatetraenoic acid</li> <li>- Adrenic Acid</li> <li>- 4,7,10,13-docosatetraenoic acid</li> <li>- Arachidonic acid ethyl ester</li> <li>- cis-4,10,13,16-Docosatetraenoic Acid</li> <li>- 10-[3]-ladderane-decanoic acid</li> <li>- ω-3 Arachidonic Acid ethyl ester</li> <li>- 3,7,11,15-Tetramethyl-2E,6E,10E,14-hexadecatetraenyl acetate</li> </ul> |                       |                   |                     |          |
| -        | 638.3921     | 5.0435 | 638.3948       | <ul style="list-style-type: none"> <li>- PA(20:5(5Z,8Z,11Z,14Z,17Z)/12:0)</li> <li>- PA(18:4(6Z,9Z,12Z,15Z)/14:1(9Z))</li> <li>- PA(14:1(9Z)/18:4(6Z,9Z,12Z,15Z))</li> <li>- PA(12:0/20:5(5Z,8Z,11Z,14Z,17Z))</li> </ul>                                                                                                                                                                                                                                                                                                                                                                                                                                                                                                                                                                                              | 14.9                  | 0.0               | 7.3                 | p< 0.001 |
|          |              |        | 638.4159       | <ul style="list-style-type: none"> <li>- PG(12:0/14:0)</li> <li>- PG(13:0/13:0)</li> <li>- PG(14:0/12:0)</li> </ul>                                                                                                                                                                                                                                                                                                                                                                                                                                                                                                                                                                                                                                                                                                   |                       |                   |                     |          |
|          |              |        | 638.3666       | <ul style="list-style-type: none"> <li>- 26-Glucosyl-1,3,11,22-tetrahydroxyergosta-5,24-dien-26-oate</li> </ul>                                                                                                                                                                                                                                                                                                                                                                                                                                                                                                                                                                                                                                                                                                       |                       |                   |                     |          |

Supplementary Table 2. Continued

| ESI mode | Detected m/z | Rt.min | Theoretical MW | Candidate compounds                                                                                                                                                                                                                                                                                                                                                                                                                                                                                                                                                                                                                                                                               | Log FC [RSV+Q vs HFS] | Log FC [Q vs HFS] | Log FC [RSV vs HFS] | p (Corr)  |
|----------|--------------|--------|----------------|---------------------------------------------------------------------------------------------------------------------------------------------------------------------------------------------------------------------------------------------------------------------------------------------------------------------------------------------------------------------------------------------------------------------------------------------------------------------------------------------------------------------------------------------------------------------------------------------------------------------------------------------------------------------------------------------------|-----------------------|-------------------|---------------------|-----------|
| -        | 316.1365     | 4.1682 | 316.1383       | - Pro Gly Gly Ser<br>- Other peptides                                                                                                                                                                                                                                                                                                                                                                                                                                                                                                                                                                                                                                                             | 8.5                   | 0.0               | 12.6                | p< 0.0001 |
|          |              |        | 316.1311       | - 4,2',6'-Trihydroxy-4'-methoxy-3',5'-dimethyldihydrochalcone<br>- Flavokawin A<br>- 2'-Hydroxy-3',4',6'-trimethoxydihydrochalcone<br>- Kuhlmanniquinol<br>- (2S)-4'-Hydroxy-5,7,3'-trimethoxyflavan<br>- Combrestatin A4<br>- 4-Hydroxy-5,7,4'-trimethoxyflavan<br>- 2-(3,5-Dimethoxyphenyl)-3,4-dihydro-7-methoxy-2H-1-benzopyran-5-ol<br>- 5'-Hydroxy-3',4',7-trimethoxyflavan<br>- O-Methylodoratol<br>- 7-Hydroxy-2',4',5'-trimethoxyisoflavan<br>- 7-Hydroxy-2',3',4'-trimethoxyisoflavan<br>- EPIAFZELECHIN TRIMETHYL ETHER<br>- Loureirin B<br>- Verimol A<br>- 2-Hydroxy-3,4,6-trimethoxydihydrochalcone<br>- Verimol B<br>- 2-Hydroxy-4,5,6-trimethoxydihydrochalcone<br>- Sorgolactone |                       |                   |                     |           |
|          |              |        | 316.1462       | - 11,11,11,12,12-Pentafluoro-9Z-dodecenyl acetate                                                                                                                                                                                                                                                                                                                                                                                                                                                                                                                                                                                                                                                 |                       |                   |                     |           |
|          |              |        | 316.1463       | - 4,7,10,13,16,19-Docosahexanoic acid                                                                                                                                                                                                                                                                                                                                                                                                                                                                                                                                                                                                                                                             |                       |                   |                     |           |
|          |              |        | 316.1246       | - Promazine N-oxide sulfoxide<br>- 2-Hydroxypromazine sulfoxide<br>- 3-Hydroxypromazine sulfoxide                                                                                                                                                                                                                                                                                                                                                                                                                                                                                                                                                                                                 |                       |                   |                     |           |

Statistical analyses were performed using One-Way ANOVA followed by Tukey range test and *p* values were corrected by Benjamini-Hochberg procedure. ESI, electrospray ionization mode; Rt, retention time; MW, molecular weight; HFS, high fat sucrose diet-fed control rats; RSV, supplemented with 15 mg/kg BW/day of *trans*-resveratrol; Q, supplemented with 30 mg/kg BW/day of quercetin; RSV + Q, supplemented with a combination of *trans*-resveratrol and quercetin at the same doses; Log FC, log<sub>2</sub> value of fold change.
